# Supplementary material
Source: ML conference proceedings conference paper supplement (https://openaccess.thecvf.com/content/CVPR2024/html/Li_VidToMe_Video_Token_CVPR_2024_paper.html)
Supplement: Supplementary file 1 [file Li_VidToMe_Video_Token_CVPR_2024_supplemental.zip]

Archive with 2 entries (2 files):
- Supply/CVPR_2024__5845_VidToMe__Video_Token_Merging_for_Zero_Shot_Video_Editing_Supplementary_Material.pdf
- Supply/Results.mp4
